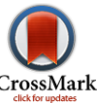

# Ycf93 (Orf105), a Small Apicoplast-Encoded Membrane Protein in the Relict Plastid of the Malaria Parasite *Plasmodium falciparum* That Is Conserved in Apicomplexa

Christopher D. Goodman, Geoffrey I. McFadden\*

School of Botany, University of Melbourne, Parkville, Victoria, Australia

## Abstract

Malaria parasites retain a relict plastid (apicoplast) from a photosynthetic ancestor shared with dinoflagellate algae. The apicoplast is a useful drug target; blocking housekeeping pathways such as genome replication and translation in the organelle kills parasites and protects against malaria. The apicoplast of *Plasmodium falciparum* encodes 30 proteins and a suite of rRNAs and tRNAs that facilitate their expression. *orf105* is a hypothetical apicoplast gene that would encode a small protein (*PfOrf105*) with a predicted C-terminal transmembrane domain. We produced antisera to a predicted peptide within *PfOrf105*. Western blot analysis confirmed expression of *orf105* and immunofluorescence localised the gene product to the apicoplast. *PfOrf105* encodes a membrane protein that has an apparent mass of 17.5 kDa and undergoes substantial turnover during the 48-hour asexual life cycle of the parasite in blood stages. The effect of actinonin, an antimalarial with a putative impact on post-translational modification of apicoplast proteins like *PfOrf105*, was examined. Unlike other drugs perturbing apicoplast housekeeping that induce delayed death, actinonin kills parasites immediately and has an identical drug exposure phenotype to the isopentenyl diphosphate synthesis blocker fosmidomycin. Open reading frames of similar size to *PfOrf105*, which also have predicted C-terminal trans membrane domains, occur in syntenic positions in all sequenced apicoplast genomes from Phylum Apicomplexa. We therefore propose to name these genes *ycf93* (hypothetical chloroplast reading frame 93) according to plastid gene nomenclature convention for conserved proteins of unknown function.

**Citation:** Goodman CD, McFadden GI (2014) Ycf93 (Orf105), a Small Apicoplast-Encoded Membrane Protein in the Relict Plastid of the Malaria Parasite *Plasmodium falciparum* That Is Conserved in Apicomplexa. PLoS ONE 9(4): e91178. doi:10.1371/journal.pone.0091178

**Editor:** Gordon Langsley, Institut national de la santé et de la recherche médicale - Institut Cochin, France

**Received:** December 30, 2013; **Accepted:** February 10, 2014; **Published:** April 4, 2014

**Copyright:** © 2014 Goodman, McFadden. This is an open-access article distributed under the terms of the Creative Commons Attribution License, which permits unrestricted use, distribution, and reproduction in any medium, provided the original author and source are credited.

**Funding:** A Program Grant from the Australian National Medical Health and Research Council and a Federation Fellowship to GIM and a Discovery Project to GIM are gratefully acknowledged. The funders had no role in study design, data collection and analysis, decision to publish, or preparation of the manuscript.

**Competing Interests:** The authors have declared that no competing interests exist.

\* E-mail: gim@unimelb.edu.au

## Introduction

The widely used malaria prophylactic, doxycycline, was originally developed as an antibacterial that blocks protein translation by prokaryotic ribosomes [1]. Efficacy against malaria is believed to result from inhibition of translation in the relict plastids (apicoplast) of malaria parasites [2]. Other inhibitors of prokaryotic translation, plus inhibitors of apicoplast DNA replication (fluoroquinolones like ciprofloxacin) are also parasiticidal [2,3]. Indeed, any perturbation of apicoplast housekeeping appears to kill malaria parasites [2,3]. This highlights the importance of the maintenance of the apicoplast for parasite survival.

Apicoplasts arose by secondary endosymbiosis of a red alga within the common ancestor of Apicomplexa and dinoflagellates [4]. Most dinoflagellates remain photosynthetic, but Apicomplexa adopted a parasitic lifestyle and dispensed with photosynthesis [5,6]. The endosymbiotic organelle, however, persists and is indispensable [7]. The apicoplast of the human malaria parasite *Plasmodium falciparum* has a small (35 kb), circular genome similar to that of most plastids; the major difference being that the apicoplast genome encodes no genes for photosynthesis [8]. Thirty putative

protein-encoding genes have been identified on the *P. falciparum* apicoplast genome, and seven of these are hypothetical proteins (open reading frames >50 amino acids) [8]. With the exception of SufB/ORF470, which has a role in the formation of iron:sulphur clusters, and ClpC, a protein chaperone subunit with a possible role in protein import [9], all apicoplast genes with known roles are devoted to expression of the genome (housekeeping) [8]. Further information of the roles of these genes, particularly the hypothetical ones, could thus be valuable in targeting apicoplasts in the battle against malaria.

To explore the roles of hypothetical apicoplast proteins we attempted to generate antisera to predicted peptides from a selection of the hypothetical apicoplast genes (ORFs) that possibly encode proteins. Here we describe the characterization of one previously hypothetical apicoplast protein – Orf105/*PfYcf93* – to which we generated a successful antiserum allowing us to localize the protein to the apicoplast membranes, document its turnover during the cell cycle, and explore effects of a post-translation inhibitor on the apicoplast and *PfYcf93*. We also searched for homologues of *PfYcf93* in the apicoplast genomes of other apicomplexan parasites and related photosynthetic symbionts of

corals such as the chromerids *Chromera velia* and *Vitrella brassicaformis*.

## Results and Discussion

### *PfYcf93* is an apicomplast-encoded protein

*orf105* is an open reading frame (366 nucleotides) located on the IR-B section of the 35 kb circular genome of the apicomplast of *P. falciparum* (GenBank: X95276.2) that encodes a hypothetical protein of 121 amino acids [8]. The name *orf105* stems from a previous annotation for a shorter version of the protein that invokes a downstream Met based on the presence of a transcribed and processed *tmS* gene within the N-terminus of the 121 amino acid open reading frame [10]. In keeping with plastid gene nomenclature convention for gene products conserved in multiple species [11] we designated the gene *ycf93* (hypothetical chloroplast open reading frame 88) because orthologues occur in numerous Apicomplexa (see below).

Goat antisera raised against a 14-residue peptide (NILKSKNSNNYIY) were used for immunofluorescence on *in vitro* cultured blood stage *P. falciparum* parasites (Fig. 1A). Antigen (red) was localized to a small punctum (Fig. 1A). Co staining (green) with antisera to the apicomplast marker acyl carrier protein (ACP) [12] showed the antigen recognised by our goat antiserum co localized with the apicomplast adjacent to the nucleus (Fig. 1A). We conclude that the peptide antisera recognises an antigen located in the apicomplast.

### *PfYcf93* is an apicomplast membrane protein and may form dimers

Western blotting using the peptide antisera identified a single band of 17.5 kDa (Fig. 1B), which is in reasonable agreement with the predicted mass for *PfOrf105/PfYcf93* of 15 kDa. Controls with pre-immune sera did not decorate any bands (Fig. 1B). Specificity of the antisera for *PfYcf93* was verified by pre-incubation of the antiserum with 10 mg/ml peptide, which abrogated binding to the 17.5 kDa band (Fig. 1C). We conclude that the antiserum is specific for the gene product of the apicomplast gene *Pforf105*, confirming it as a protein-encoding gene, which we rename *Pfycf93*.

*PfYcf93* protein partitions into the detergent phase during Triton X-114 phase partitioning [13], indicating that it is a membrane protein (Fig. 1D). This membrane localization confirms the bioinformatic predictions of a single C-terminal transmembrane domain. In detergent partitioned non-denaturing Western blots, a second major band of apparent molecular mass 37 kDa was observed (Fig. 1D), indicating that *PfYcf93* may exist as a dimer. Based on the immunofluorescence, Western blots, and detergent partitioning we conclude that *Pfycf93* encodes a small apicomplast membrane protein. Considering the apicomplast appears to lack any systems such as YidC/Oxa/Alb3 chaperone family proteins involved in insertion, export or assembly of membrane proteins [14,15], it seems most likely that *PfYcf93* is located in the innermost of the four bounding membranes and self inserts.

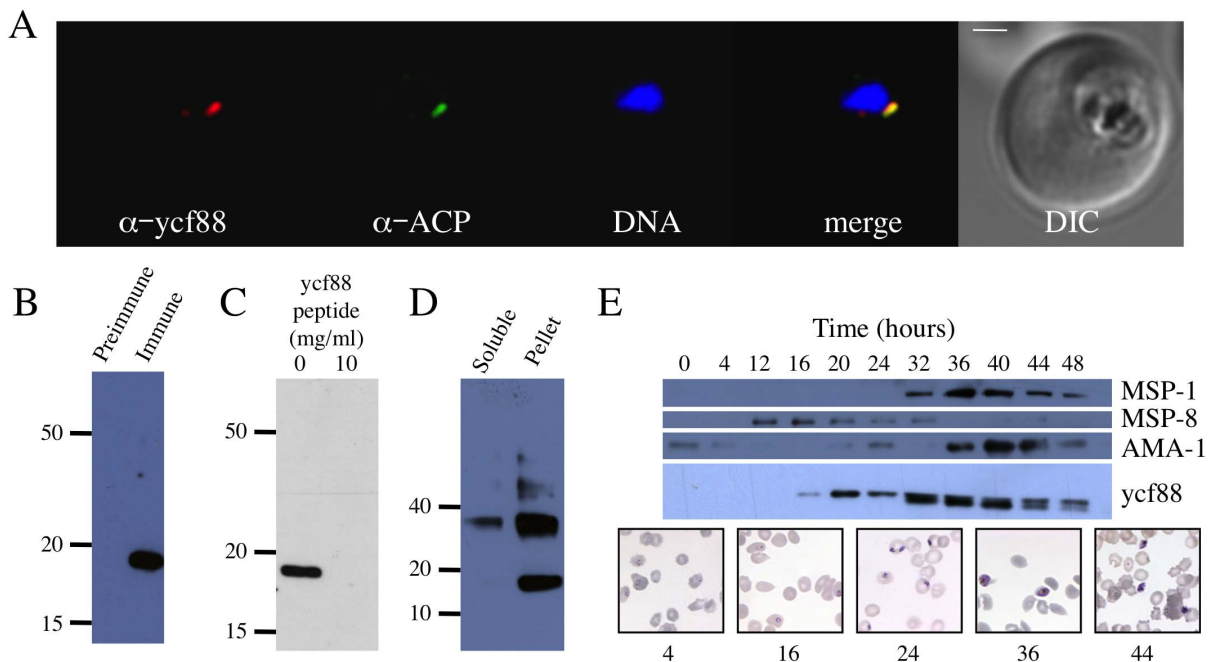

**Figure 1. Characterization of *Pfycf93* gene product in *Plasmodium falciparum*.** A) Localization in the apicomplast of an antigen recognised by *PfYcf93* peptide antisera. *PfYcf93* (red) localises to a small punctum that overlaps with the apicomplast marker acyl carrier protein (green) and sits beside the nucleus (blue) in a small, ring-stage parasite within a red blood cell. Bar = 1  $\mu$ m. B) Western blot of SDS-PAGE separated proteins labelled with either pre-immune or immune sera demonstrates specific labelling of a 17.5 kDa protein. C) Labelling of the 17.5 kDa protein with the peptide antiserum is abrogated by pre-incubation of the membrane with 10 mg/ml of peptide. D) *PfYcf93* protein partitions into the pellet during Triton X-114 partitioning, and a second band of 35 kDa is apparent. E) Western blotting of the 17.5 kDa band across the 48 hour asexual red blood cell cycle of synchronized parasites demonstrates that *Pfycf93* is not detectable at 0, 4, or 12 hours but begins to be detectable at 16 hours and then increases in abundance from 20 to 40 hours and then decreases again at 44 and 48 hours. The change in abundance of the 17.5 kDa band is similar to published fluctuations of merozoite surface protein 1 (MSP-1), but contrasts to MSP-8 and apical merozoite antigen 1 (AMA-1), which have very different turnover patterns. Giemsa stained images of parasite development at different time points are shown. Loading was normalised by protein amount and equal loading confirmed by Ponceau staining (data not shown). doi:10.1371/journal.pone.0091178.g001

### *PfYcf93* undergoes turnover

During the 48-hour life cycle of malaria parasites the apicomplast undergoes dramatic growth, branching, and division resulting in the distribution of an apicomplast into each daughter merozoite [16]. We monitored the steady state levels of *PfYcf93* protein across the life cycle by Western blot on a synchronous culture of *P. falciparum* (Fig. 1E & 2A). In the initial part of the life cycle just following invasion (0 hours), the so-called ring stage parasites did not have any detectable *PfYcf93* (Fig. 1E). After 4 hours (early rings) and 12 hours (early trophozoites) *PfYcf93* was still not detectable (Fig. 1E). At 16 hours a faint *PfYcf93* band had developed, and by 20 hours (late trophozoites) there was a robust *PfYcf93* band, which persisted right through the trophozoite phase and into schizogony but then decreased at 44 hours and still further at 48 hours (Fig. 1E). By comparison, probing of the same samples with antibodies to the merozoite surface protein 1 (MSP1) confirms previous reports that MSP1 only begins to be expressed at 32 hours and persists through to early rings (0 hours and 4 hours). Conversely, merozoite surface protein 8 (MSP8) shows a restricted window of expression between 4 and 24 hours, as previously described [17], and the apical merozoite antigen (AMA1) has maximal expression in the schizont/merozoite phase (36–0 hours) as described [18].

The drastic disappearance of *PfYcf93* protein toward the latter part of schizogony (Fig. 1E & 2A) suggests that *PfYcf93* undergoes degradation, probably during the late stage of formation of merozoites. This is the first clear example of protein turnover

within apicomplasts. Plastids of plants undergo substantial protein turnover due to activity of a range of proteases, most of which are inherited from the cyanobacterial endosymbiotic ancestor of plastids [19]. Three apicomplast proteases (signal processing peptidase [SPP] [20], falcilysin/PreP [21], and caseinolytic protease (Clp) [9,22,23]) have been identified in *Plasmodium*. SPP and PreP are believed to have roles in processing of leader peptides that mediate import of nucleus-encoded proteins into the apicomplast [20,21], so Clp is the prime candidate for turnover of *PfYcf93*.

### Is *PfYcf93* subject to post-translational modification?

Like bacteria, plastids use a formyl methionine as the initiator Met for proteins encoded by the plastid genome and synthesised within the plastid [24]. The formyl group is added to the initiator methionine by formyl methionine transferase (FMT) and is later removed from the methionine by peptide deformylase (PDF) after translation [24]. In select instances (depending on the identity of the second amino acid) the deformylated methionine itself is then removed by methionine aminopeptidase (MAP) [24], which influences protein stability [25]. Genes for likely apicomplast FMT, PDF and MAP have been identified in *Plasmodium falciparum* [14,26] and *PfPDF* is indeed targeted to the apicomplast [27] suggesting homologous N-terminal processing occurs in the apicomplast. Several drugs inhibit PDF [28–32] and one, actinonin, has been noted to have antimalarial activity [33]. Recombinant *PfPDF* has been expressed and its structure determined [34].

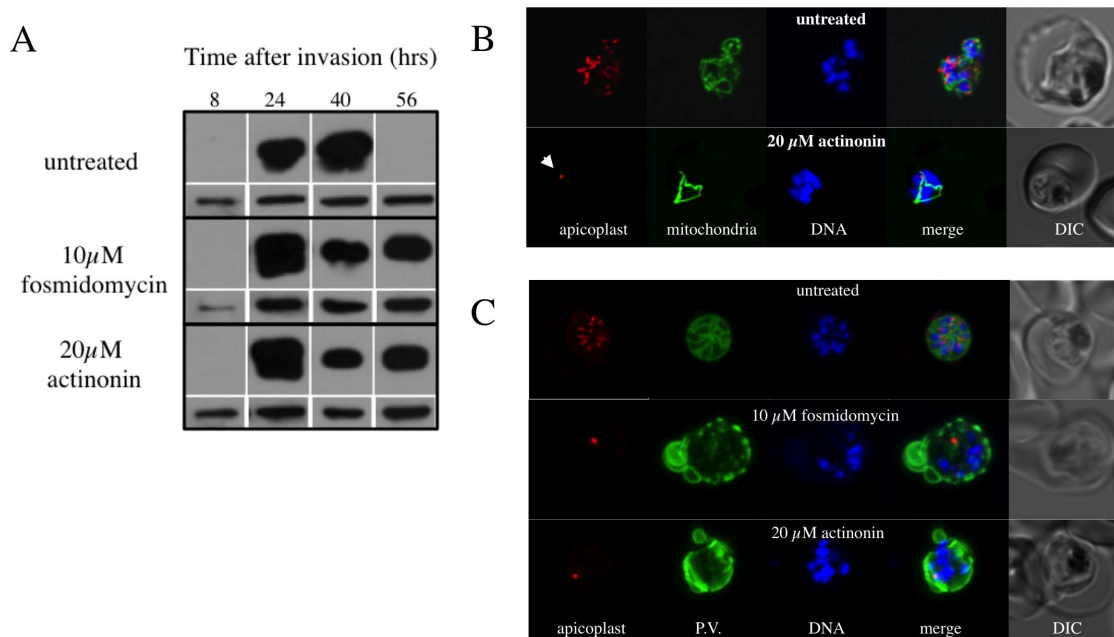

**Figure 2. The effects of the prokaryotic post-translational modification inhibiting drug actinonin on *PfYcf93* turnover and apicomplast development and cytokinesis.** A) Western blot showing the effect of actinonin and the isoprenoid precursor synthesis inhibitor fosmidomycin on steady state levels of *PfYcf93* over one life cycle. Treatment with these drugs abrogates the normal turnover of *PfYcf93* observed during schizont (40 hour) to ring (56 hour) transition. Loading controls at each life cycle stage using anti-BiP are shown in the lower panels. B) Effect of the putative post-translational inhibitor actinonin on biogenesis of the apicomplast, mitochondria and nuclei. Live cell imaging of untreated parasite with red fluorescent apicomplast, green fluorescent mitochondrion and blue fluorescent nuclei shows the normal branching/division of the apicomplast, elaboration of the mitochondrion and multiplication of the nucleus at the schizont stage. Actinonin-treated parasite at the same stage shows a branched mitochondrion and multiple nuclei but an undeveloped, stunted apicomplast (arrow). C) Effect of fosmidomycin and actinonin on the apicomplast and parasitophorous vacuole (P.V.) at the schizont stage. Immunofluorescence assay of untreated parasite with red fluorescent apicomplast (anti-ACP), green P.V. and blue fluorescent nuclei shows the segregation of the apicomplast, nuclei into distinct merozoites during late schizont stage. Actinonin or fosmidomycin treated parasites at the same stage show multiple nuclei but an undeveloped apicomplast and severe disruption of internal membrane structure in the parasite. doi:10.1371/journal.pone.0091178.g002

Activity of recombinant *Pf*PDF is inhibited by actinonin in *in vitro* assays [34]. Four apicomplast-encoded proteins from *P. falciparum* (Rps3, Rpl16, Orf91 and Orf105/Ycf93) contain the correct amino acid at residue two [8] to potentially undergo removal of the N-terminal methionine after deformylation by *Pf*PDF. We therefore decided to explore the effect of actinonin on parasite growth, the N-terminus of *Pf*Ycf93, and the turnover of *Pf*Ycf93 during the asexual red blood cell cycle.

*In vitro* culture drug trials of *P. falciparum* 3D7 confirmed reports [33] that the PDF inhibitor actinonin is parasitocidal with an  $IC_{50}$  of  $4.9 (\pm 1.05) \mu\text{M}$  for a 48 hour growth assay. Drugs targeting apicomplast housekeeping activities (DNA replication, RNA transcription, and protein translation) typically result in the curious phenomenon known as delayed death in apicomplexan parasites [3,7]. Delayed death alludes to the fact that the drugs have minimal effect during the cell cycle in which they are applied, but exhibit maximal lethality during the subsequent cell cycle, even if the drugs have been removed after exposure in the initial cycle [3,7,35–37]. How this phenomenon works remains uncertain, but the leading hypothesis is that a stockpile of some factor essential to a successful invasion of fresh host cells for the second cell cycle must be accumulated during the first cell cycle, when the drugs take effect [14]. Since actinonin would theoretically be an inhibitor of post-translational modification, we decided to trial its activity over two asexual red blood cell cycles to test for delayed death. Intriguingly, the  $IC_{50}$  of  $2.7 (\pm 0.15) \mu\text{M}$  for 96 hours (two cycles) shows only a modest decrease in comparison with the  $IC_{50}$  of  $4.9 (\pm 1.05) \mu\text{M}$  over 48 hours (one cycle), suggesting that actinonin does not cause classic delayed death.

Since the putative post-translational inhibitor actinonin was not inducing the anticipated delayed death response, we decided to explore the effect of this inhibitor on turnover of *Pf*Ycf93. Exposure to  $20 \mu\text{M}$  actinonin prevented the degradation of *Pf*Ycf93 that normally occurs during the conversion from schizonts to merozoites then rings between 40 and 56 hours after invasion in the asexual erythrocyte life cycle (Fig. 2A). However, interpretation of the impact of actinonin on turnover of *Pf*Ycf93 is complicated by the fact that this drug also impairs progression through the cell cycle. We exposed parasites with red fluorescent apicomplasts, green fluorescent mitochondria [16] and blue fluorescent DNA to  $20 \mu\text{M}$  actinonin and undertook live cell imaging to observe the effect of the drug on organelle development and schizogony (Fig. 2B). Under actinonin drug pressure, apicomplast development and parasite progression through schizogony are both blocked (Fig. 2B). Actinonin treatment of parasites reveals drastic retardation of apicomplast development. At the late trophozoite stage the apicomplast is normally highly branched forming a network around the nuclei [16], but actinonin-treated apicomplasts failed to develop and remained small and rounded, like they are in ring stages (Fig. 2B). Intriguingly, there is virtually no discernible impact of actinonin on the division of mitochondria and nuclei, which branch and divide respectively as normal (Fig. 2B and 2C). There is, however, a marked impact of actinonin treatment on merozoite development; a marker for the parasitophorous vacuole showed drastic defects in membrane structure at the late schizont stage resulting in a failure to undergo cytokinesis (Fig. 2C). We conclude that actinonin blocks apicomplast growth and division, including the turnover of *Pf*Ycf93, likely through inhibition of *Pf*PDF in the apicomplast, though that remains to be formally proven.

Immediate death and specific inhibition of apicomplast development in *P. falciparum* (and *P. berghei*) also occurs with exposure to the drug fosmidomycin [38], which inhibits the production of isopentenyl diphosphate [39], an essential product of apicomplasts in

the red blood cell stage of the parasite life cycle [40]. We examined the impact of fosmidomycin on *Pf*Ycf93 turnover and observed the same effect as actinonin - abrogation of turnover (Fig. 2B). Similarly, fosmidomycin also blocked apicomplast growth, perturbed schizogony and the appropriate segmentation of the parasitophorous vacuole (Fig. 2C). The remarkable similarity of the drug response phenotypes for actinonin and fosmidomycin perhaps suggests that actinonin perturbs synthesis of isopentenyl diphosphate, but this remains to be established.

Whether or not actinonin impacts directly on *Pf*Ycf93 turnover is difficult to conclude since impairment of apicomplast development by either actinonin or fosmidomycin might indirectly prevent stage specific turnover simply by blocking stage progression. We attempted to determine the actual N-terminus of *Pf*Ycf93 with and without actinonin by immunoprecipitating the protein and N-terminal sequencing by Edman degradation to explore any N-terminal processing by PDF/MAP, but found the N-terminus to be blocked (data not shown). N-terminal blockage for Edman degradation occurs frequently when attempting to sequence proteins [41] and cannot be inferred to result from PDF modification or lack thereof.

### Ycf93 protein family in Apicomplexa

Apicomplast genomes are available for 14 apicomplexan parasites, namely nine species of the Haemosporida genus *Plasmodium* [8,42,43], one bird Haemosporida (*Leucocytozoon caulleri* [44]), two Coccidia (*Eimeria tenella* [45] and *Toxoplasma gondii* [46]), and two Piroplasmida (*Babesia bovis* [47,48] and *Theileria parva* [49]). We examined the IR-B region (or equivalent) of these genomes plus that of the related chromerid algae *Vitrella brassicaformis* [50] and *Chromera velia* [51] for possible orthologues of *yef93/orf105*. Syntenic orthologues of *Pf*yef93 with clear sequence identity exist in all sequenced apicomplast genomes of *Plasmodium* spp. plus *Leucocytozoon caulleri* (Figs. 3 and 4). The *Plasmodium* spp. and *L. caulleri* Ycf93 proteins all contain a predicted C-terminal transmembrane domain (Fig. 4A).

Amino acid alignment shows a 16 amino acid N-terminal extension in the *P. falciparum* Ycf93 and a 17 amino acid extension in the Ycf93 orthologue of another primate malaria parasite, *P. cynomolgi* (Fig. 4A). In both cases this extension is predicted to create a second, N-terminal transmembrane domain in addition to the single, predicted C-terminal transmembrane domain. We note that internal methionines in *Pf*Ycf93 and *Pc*Ycf93 occur at the same site as the initiator methionines in the Ycf93 proteins from *L. caulleri* and the other eight malaria parasite species (Fig. 4A), which includes human, bird and rodent infecting species. This internal methionine was initially invoked for *Pf*Ycf93 due to the presence of a transcribed and processed *tmS* gene within the N-terminus of the longer version of *Pf*Ycf93 [10]. A *tmS* gene also occurs in the currently annotated version of *Pc*Ycf93 [43] so we consider it most likely that both *Pf*Ycf93 and *Pc*Ycf93 use this internal methionine for initiation. If *Pf*Ycf93 were in fact initiated from the internal methionine, it would not be a substrate for MAP according to the prediction rules [8]. The apparent mass of *Pf*Ycf93 (slightly greater than predicted) might suggest that the longer version rather than the shorter version is translated, but the addition of a second transmembrane domain in just these two species seems unlikely, and (as mentioned above) confirmation of the N-terminus and of any processing remains to be made.

The apicomplast genomes of the coccidian apicomplexan parasites *Toxoplasma gondii* and *Eimeria tenella* have almost identical architecture and gene content to *Plasmodium* spp. [46] and likely orthologues of *yef93* occur in these parasites (Fig. 3), though the sequence identity with *Pf*Ycf93 proteins is very low (not shown).



Nevertheless, *TgYcf93* and *EfYcf93* are similar size proteins, have a predicted C-terminal trans membrane domain, and are well conserved between these two Coccidia (Fig. 4B). Possible *ycf93* orthologues also exist in two members of the Piroplasmorida, namely *Babesia bovis* [47] and *Theileria parva* [49] (Fig. 3). The proteins encoded by these small open reading frames lack much overall sequence identity but are relatively similar within lineage (Fig. 4C). Moreover, a predicted C-terminal trans membrane domain exists in *TpYcf93* (Fig. 4C), and the genes are situated in syntenic position to other members of the family (Fig. 3) so we believe them to be orthologous.

It is also possible that a *ycf93* orthologue exists in the plastids of the related photosynthetic coral symbiont *Vitrella brassicaformis* [50], a chromerid alga related to *Chromera velia* [51]. These algae share a common origin of the plastid with Apicomplexa, but remain photosynthetic [4]. In *V. brassicaformis* good conservation of the gene order in the plastid DNA compared to the apicoplast genome is evident, particularly in comparison with the apicoplast of *B. bovis*, the key difference in this region being the obvious loss of the photosynthesis genes (*petD*, *petA*, *psbC* and *chlB*) in the parasite genome (Fig. 3). A small open reading frame, situated between *rpl20* and *rpoB* in *V. brassicaformis* [4], might be an orthologue of apicoplast *ycf93* (Fig. 3), but it shares only modest sequence identity (Fig. 4D), and, unlike all the orthologues in Apicomplexa, is not predicted to contain any trans membrane domain. Drastic rearrangement of the plastid genome in *C. velia* [4] prevents any identification of putative Ycf93 homologues.

Synteny comparison between the apicoplast genomes and the plastid genome of *V. brassicaformis* in the *ycf93* region indicate that the *rpo/rps2* operon underwent reorientation(s) (Fig. 3). The alga *V. brassicaformis* and the two Piroplasmorida (*B. bovis* and *T. parva*) share the same orientation of this operon, but the Haemosporidia (*Plasmodium* and *Leucocytozoon*) and the Coccidia (*Toxoplasma* and *Eimeria*), which share an almost identical architecture [44], have the reverse orientation (Fig. 3). Rearrangements in plastid genomes are common, and it is difficult to interpret a single reorientation in isolation, especially because the Piroplasmorida apicoplast genomes are unusual in being transcribed off a single strand and presumably underwent substantial rearrangements to achieve this.

## Conclusions

We have demonstrated that *orf105/ycf93* from the apicoplast genome of *P. falciparum* encodes a small membrane protein that likely resides in the inner membrane of the apicoplast and undergoes dramatic turnover during the asexual red blood cell life cycle of the parasite. The complete disappearance of this protein after schizogony, and its putative location in the inner apicoplast membrane, might suggest a role in apicoplast biogenesis, but sequence comparison does not give any clues to function. Orthologues of *orf105/ycf93* occur in all apicoplasts, and perhaps the plastid of the related photosynthetic coral symbiont *V. brassicaformis*. In keeping with plastid gene nomenclature convention [11] we elevate the gene from *orf* status to *ycf* (hypothetical chloroplast open reading frame) status as a protein encoded in plastids of multiple organisms, and we occupy the next available number *ycf93*.

## Materials and Methods

### Parasite Culture and Drug Treatment

*Plasmodium falciparum* strains 3D7, D10, mitoYFP/apicoRFP [16], and KAHRP-GFP (Wickham et al., EMBO J 2001) were *in vitro* cultured using standard techniques [52]. We thank the Australian Red Cross for red blood cells. Parasite synchronization was done using sequential sorbitol lysis as previously described [3]. Parasites used were isolated from red blood cells by incubating with 0.15% saponin and 0.1% BSA in PBS at 4°C followed by extensive washing with PBS.

Drug trials were carried out on tightly synchronized parasites using a modified version of the SYBRgreen assay [3,53]. IC<sub>50</sub> values were calculated using the four-component inhibition model in Graphpad Prism.

For microscopy and Western analysis of drug treated parasites, inhibitors were added to double synchronised parasites within 4 hours after invasion of a new host cell.

### Peptide Antisera

The peptide NILLKSKNSNNY was selected based on an analysis of the antigenicity and hydrophobicity of the amino acid sequence of *PfYcf93* using VectorNTI (Invitrogen). The peptide was compared to the *P. falciparum* genome and found to be unique for sequences >6 amino acids in length. The peptide was conjugated to *Diphtheria* toxin (Mimotopes) and used to generate polyclonal goat serum (Antibodies Australia). Antibodies were affinity-purified from serum using immobilized peptide as described [54].

### Western Blotting

Protein extraction and Western blotting were done as previously described [54]. For the competition assay, unconjugated *PfYcf93* peptide (Mimotopes) was added to affinity-purified antibodies immediately prior to probing the membrane. Triton X-114 membrane partitioning and subsequent Western blot analysis was carried out as previously described [55]. Affinity purified anti-*PfYcf93*, anti-MSP1-19 [56], anti-AMA1 [18], anti-MSP8 [17], and anti-BiP [57] antibodies were used at 5000:1, 2000:1, 2000:1, 1000:1 and 1000:1 dilutions, respectively.

### Immunofluorescence Assay

Parasite fixation and labelling was carried out as previously described [27] except for the *PfYcf93* assay in which cell permeabilization and subsequent washing was carried out at 60°C. Affinity purified goat anti-*PfYcf93*, rabbit anti-ACP [12] antibodies were used at 250:1 and 500:1 respectively. Alexafluor conjugated anti-goat 488 and anti-rabbit 543 (Invitrogen) were used at 1000:1 dilution. Nuclei were stained with Hoechst 33342. Images were collected using a Leica SP2 confocal microscope and assembled for publication using Adobe Photoshop.

### Bioinformatics

Protein sequences were aligned with ClustalW2 using default parameters [58]. Transmembrane domain predictions were made with THHMM version 2.0 [59].

### Author Contributions

Conceived and designed the experiments: CDG GIM. Performed the experiments: CDG GIM. Analyzed the data: CDG GIM. Wrote the paper: GIM.

## References

- Tan KR, Magill AJ, Parise ME, Arguin PM, Centers for Disease C, et al. (2011) Doxycycline for malaria chemoprophylaxis and treatment: report from the CDC expert meeting on malaria chemoprophylaxis. *Am J Trop Med Hyg* 84: 517–531.
- Krishna S, Staines HM (2012) Non-Antifolate Antibiotics: Clindamycin, Doxycycline, Azithromycin and Fosmidomycin. In: Staines HM, Krishna S, editors. *Treatment and Prevention of Malaria: Antimalarial Drug Chemistry, Action and Use*: Springer. pp. 141–156.
- Goodman CD, Su V, McFadden GI (2007) The effects of anti-bacterials on the malaria parasite *Plasmodium falciparum*. *Mol Biochem Parasitol* 152: 181–191.
- Janouskovec J, Horak A, Obornik M, Lukes J, Keeling PJ (2010) A common red algal origin of the apicomplexan, dinoflagellate, and heterokont plastids. *Proc Natl Acad Sci U S A* 107: 10949–10954.
- McFadden GI, Waller RF (1997) Plastids in parasites of humans. *BioEssays* 19: 1033–1040.
- Okamoto N, McFadden GI (2008) The mother of all parasites. *Future Microbiol* 3: 391–395.
- Fichera ME, Roos DS (1997) A plastid organelle as a drug target in apicomplexan parasites. *Nature* 390: 407–409.
- Wilson RJM, Denny PW, Preiser PR, Rangachari K, Roberts K, et al. (1996) Complete gene map of the plastid-like DNA of the malaria parasite *Plasmodium falciparum*. *J Mol Biol* 261: 155–172.
- El Bakkouri M, Pow A, Mulichak A, Cheung KL, Artz JD, et al. (2010) The Clp chaperones and proteases of the human malaria parasite *Plasmodium falciparum*. *J Mol Biol* 404: 456–477.
- Preiser P, Williamson DH, Wilson RJ (1995) tRNA genes transcribed from the plastid-like DNA of *Plasmodium falciparum*. *Nucl Acids Res* 23: 4329–4336.
- Hallick RB, Bairoch A (1994) Proposals for the Naming of Chloroplast Genes. III. Nomenclature for Open Reading Frames Encoded in Chloroplast Genomes. *Plant Mol Biol Reporter* 12: S29–S30.
- Waller RF, Cowman AF, Reed MB, McFadden GI (2000) Protein trafficking to the plastid in *Plasmodium falciparum* is via the secretory pathway. *EMBO J* 19: 1794–1802.
- Bordier C (1981) Phase separation of integral membrane proteins in Triton X-114 solution. *J Biol Chem* 256: 1604–1607.
- Ralph SA, van Dooren GG, Waller RF, Crawford MJ, Fraunholz MJ, et al. (2004) Metabolic maps and functions of the *Plasmodium falciparum* apicoplast. *Nat Rev Microbiol* 2: 203–216.
- Zhang YJ, Tian HF, Wen JF (2009) The evolution of YidC/Oxa/Alb3 family in the three domains of life: a phylogenomic analysis. *BMC Evol Biol* 9: 137.
- van Dooren GG, Marti M, Tonkin CJ, Stimmeler LM, Cowman AF, et al. (2005) Development of the endoplasmic reticulum, mitochondrion and apicoplast during the asexual life cycle of *Plasmodium falciparum*. *Mol Microbiol* 57: 405–419.
- Drew DR, Sanders PR, Crabb BS (2005) *Plasmodium falciparum* merozoite surface protein 8 is a ring-stage membrane protein that localizes to the parasitophorous vacuole of infected erythrocytes. *Infect Immun* 73: 3912–3922.
- Triglia T, Healer J, Caruana SR, Hodder AN, Anders RF, et al. (2000) Apical membrane antigen 1 plays a central role in erythrocyte invasion by *Plasmodium* species. *Mol Microbiol* 38: 706–718.
- Kato Y, Sakamoto W (2013) Plastid protein degradation during leaf development and senescence: Role of proteases and chaperones. *Advances in Photosynthesis and Respiration* 36: 453–477.
- van Dooren GG, Su V, D'Ombrain MC, McFadden GI (2002) Processing of an apicoplast leader sequence in *Plasmodium falciparum* and the identification of a putative leader cleavage enzyme. *J Biol Chem* 277: 23612–23619.
- Ponpuak M, Klemba M, Park M, Gluzman IY, Lamppa GK, et al. (2007) A role for falcilysin in transit peptide degradation in the *Plasmodium falciparum* apicoplast. *Mol Microbiol* 63: 314–334.
- Rathore S, Sinha D, Asad M, Bottcher T, Afrin F, et al. (2010) A cyanobacterial serine protease of *Plasmodium falciparum* is targeted to the apicoplast and plays an important role in its growth and development. *Mol Microbiol* 77: 873–890.
- Lin W, Chan M, Sim TS (2009) Atypical caseinolytic protease homolog from *Plasmodium falciparum* possesses unusual substrate preference and a functional nuclear localization signal. *Parasitol Res* 105: 1715–1722.
- Giglione C, Meinnel T (2001) Organellar peptide deformylases: universality of the N-terminal methionine cleavage mechanism. *Trends Plant Sci* 6: 566–572.
- Giglione C, Vallon O, Meinnel T (2003) Control of protein life-span by N-terminal methionine excision. *Embo J* 22: 13–23.
- Gardner MJ, Hall N, Fung E, White O, Berriman M, et al. (2002) Genome sequence of the human malaria parasite *Plasmodium falciparum*. *Nature* 419: 498–511.
- Tonkin CJ, Van Dooren GG, Spurck TP, Struck NS, Good RT, et al. (2004) Localization of organellar proteins in *Plasmodium falciparum* using a novel set of transfection vectors and a new immunofluorescence fixation method. *Mol Biochem Parasitol* 137: 13–21.
- Giglione C, Pierre M, Meinnel T (2000) Peptide deformylase as a target for new generation, broad spectrum antimicrobial agents. *Mol Microbiol* 36: 1197–1205.
- Giglione C, Meinnel T (2002) The situation on antimicrobial agents and chemotherapy in 2002: Highlights of the 42nd ICAAC. *Expert Opin Ther Targets* 6: 691–697.
- Madison V, Duca J, Bennett F, Bohanon S, Cooper A, et al. (2002) Binding affinities and geometries of various metal ligands in peptide deformylase inhibitors. *Biophys Chem* 101–102: 239–247.
- Clements JM, Beckett RP, Brown A, Catlin G, Lobell M, et al. (2001) Antibiotic activity and characterization of BB-3497, a novel peptide deformylase inhibitor. *Antimicrob Agents Chemother* 45: 563–570.
- Molteni V, He X, Nabakka J, Yang K, Kreusch A, et al. (2004) Identification of novel potent bicyclic peptide deformylase inhibitors. *Bioorg Med Chem Lett* 14: 1477–1481.
- Wiesner J, Sanderbrand S, Altincicek B, Beck E, Jomaa H (2001) Seeking new targets for antiparasitic agents. *Trends Parasitol* 17: 7–8.
- Bracchi-Ricard V, Nguyen KT, Zhou Y, Rajagopalan PTR, Chakrabarti D, et al. (2001) Characterization of an eukaryotic peptide deformylase from *Plasmodium falciparum*. *Archives of Biochemistry and Biophysics* 396: 162–170.
- Dahl EL, Rosenthal PJ (2007) Multiple antibiotics exert delayed effects against the *Plasmodium falciparum* apicoplast. *Antimicrob Agents Chemother* 51: 3485–3490.
- Dahl EL, Rosenthal PJ (2008) Apicoplast translation, transcription and genome replication: targets for antimalarial antibiotics. *Trends Parasitol* 24: 279–284.
- Dahl EL, Shock JL, Shenai BR, Gut J, DeRisi JL, et al. (2006) Tetracyclines specifically target the apicoplast of the malaria parasite *Plasmodium falciparum*. *Antimicrob Agents Chemother* 50: 3124–3131.
- Nair SC, Brooks CF, Goodman CD, Strum A, McFadden GI, et al. (2011) Apicoplast isoprenoid precursor synthesis and the molecular basis of fosmidomycin resistance in *Toxoplasma gondii*. *J Exp Med* 208: 1547–1559.
- Jomaa H, Wiesner J, Sanderbrand S, Altincicek B, Weidemeyer C, et al. (1999) Inhibitors of the nonmevalonate pathway of isoprenoid biosynthesis as antimalarial drugs. *Science* 285: 1573–1576.
- Yeh E, DeRisi J (2011) Chemical rescue of malaria parasites lacking an apicoplast defines organelle function in blood-stage *Plasmodium falciparum*. *PLoS Biology* 9: e1001138.
- Wellner D, Panneerselvam C, Horecker BL (1990) Sequencing of peptides and proteins with blocked N-terminal amino acids: N-acetylserine or N-acetylthreonine. *Proc Natl Acad Sci U S A* 87: 1947–1949.
- Arisue N, Hashimoto T, Mitsui H, Palacpac NM, Kaneko A, et al. (2012) The *Plasmodium* apicoplast genome: conserved structure and close relationship of *P. ovale* to rodent malaria parasites. *Mol Biol Evol* 29: 2095–2099.
- Sato S, Sesay AK, Holder AA (2013) The unique structure of the apicoplast genome of the rodent malaria parasite *Plasmodium chabaudi chabaudi*. *PLoS One* 8: e61778.
- Imura T, Sato S, Sato Y, Sakamoto D, Isobe T, et al. (2013) The apicoplast genome of *Leucocytozoon caulleryi*, a pathogenic apicomplexan parasite of the chicken. *Parasitol Res* published online 04 December 2013 DOI 10.1007/s00436-013-3712-9.
- Cai X, Fuller AL, McDougald LR, Zhu G (2003) Apicoplast genome of the coccidian *Eimeria tenella*. *Gene* 321: 39–46.
- Köhler S, Delwiche CF, Denny PW, Tilney LG, Webster P, et al. (1997) A plaid of probable green algal origin in apicomplexan parasites. *Science* 275: 1485–1488.
- Brayton KA, Lau AO, Herndon DR, Hannick L, Kappmeyer LS, et al. (2007) Genome sequence of *Babesia bovis* and comparative analysis of apicomplexan hemoprotozoa. *PLoS Pathog* 3: 1401–1413.
- Lau AO, McElwain TF, Brayton KA, Knowles DP, Roalson EH (2009) *Babesia bovis*: a comprehensive phylogenetic analysis of plastid-encoded genes supports green algal origin of apicoplasts. *Exp Parasitol* 123: 236–243.
- Gardner MJ, Bishop R, Shah T, de Villiers EP, Carlton JM, et al. (2005) Genome sequence of *Theileria parva*, a bovine pathogen that transforms lymphocytes. *Science* 309: 134–137.
- Obornik M, Modry D, Lukes M, Cernotikova-Stribrna E, Cihlar J, et al. (2012) Morphology, ultrastructure and life cycle of *Vitrella brassicaformis* n. sp., n. gen., a novel chromerid from the Great Barrier Reef. *Protist* 163: 306–323.
- Moore RB, Obornik M, Janouskovec J, Chrudimsky T, Vancova M, et al. (2008) A photosynthetic alveolate closely related to apicomplexan parasites. *Nature* 451: 959–963.
- Trager W, Jensen JB (1976) Human malaria parasites in continuous culture. *Science* 193: 673–675.
- Smilkstein M, Sriwilajaroen N, Kelly JX, Wilairat P, Riscoe M (2004) Simple and inexpensive fluorescence-based technique for high-throughput antimalarial drug screening. *Antimicrob Agents Chemother* 48: 1803–1806.
- Mullin KA, Lim L, Ralph SA, Spurck TP, Handman E, et al. (2006) Membrane transporters in the relict plastid of malaria parasites. *Proc Natl Acad Sci U S A* 103: 9572–9577.
- Kalanon M, Tonkin CJ, McFadden GI (2009) Characterization of two putative protein translocation components in the apicoplast of *Plasmodium falciparum*. *Eukaryot Cell* 8: 1146–1154.
- Boyle MJ, Richards JS, Gilson PR, Chai W, Beeson JG (2010) Interactions with heparin-like molecules during erythrocyte invasion by *Plasmodium falciparum* merozoites. *Blood* 115: 4559–4568.
- Kumar N, Koski G, Harada M, Aikawa M, Zheng H (1991) Induction and localization of *Plasmodium falciparum* stress proteins related to the heat shock protein 70 family. *Mol Biochem Parasitol* 48: 47–58.

58. Larkin MA, Blackshields G, Brown NP, Chenna R, McGettigan PA, et al. (2007) Clustal W and Clustal X version 2.0. *Bioinformatics* 23: 2947–2948.
59. Krogh A, Larsson B, von Heijne G, Sonnhammer EL (2001) Predicting transmembrane protein topology with a hidden Markov model: application to complete genomes. *J Mol Biol* 305: 567–580.
